RESEARCH ARTICLE

# The effects of exogenous hormones on rooting process and the activities of key enzymes of *Malus hupehensis* stem cuttings

Wangxiang Zhang<sup>1,2,3☯\*</sup>, Junjun Fan<sup>1,2☯</sup>, Qianqian Tan<sup>4</sup>, Mingming Zhao<sup>1,2</sup>, Ting Zhou<sup>1,2</sup>, Fuliang Cao<sup>1,2</sup>

**1** College of Forestry, Nanjing Forestry University, Nanjing, China, **2** Co-Innovation Center for Sustainable Forestry in Southern China, Nanjing Forestry University, Nanjing, China, **3** Yangzhou Crabapple Horticulture Company Limited, Yangzhou, China, **4** Suzhou Forestry Station, Suzhou, China

☯ These authors contributed equally to this work.

\* [malus2011@163.com](mailto:malus2011@163.com)

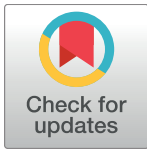

**OPEN ACCESS**

**Citation:** Zhang W, Fan J, Tan Q, Zhao M, Zhou T, Cao F (2017) The effects of exogenous hormones on rooting process and the activities of key enzymes of *Malus hupehensis* stem cuttings. PLoS ONE 12(2): e0172320. doi:10.1371/journal.pone.0172320

**Editor:** Gabriel Agbor, Institute of medical research and medicinal plant studies, CAMEROON

**Received:** September 5, 2016

**Accepted:** February 2, 2017

**Published:** February 23, 2017

**Copyright:** © 2017 Zhang et al. This is an open access article distributed under the terms of the [Creative Commons Attribution License](https://creativecommons.org/licenses/by/4.0/), which permits unrestricted use, distribution, and reproduction in any medium, provided the original author and source are credited.

**Data Availability Statement:** All relevant data are within the paper and its Supporting Information files.

**Funding:** The National Key Technology Research and Development Program of the Ministry of Science and Technology of China (2015BAD07B0104), the Jiangsu Province Science and Technology Support Program (BE2016388) and the Jiangsu Province Agricultural Science and Technology Innovation Fund Project (CX(14)2029) funded this work. Yangzhou Crabapple Horticulture

## Abstract

*Malus hupehensis* is an excellent *Malus* rootstock species, known for its strong adverse-resistance and apomixes. In the present study, stem cuttings of *M. hupehensis* were treated with three types of exogenous hormones, including indole acetic acid (IAA), naphthalene acetic acid (NAA), or green growth regulator (GGR). The effects and mechanisms of exogenous hormone treatment and antioxidant enzyme activity on adventitious root formation were investigated. The results showed that the apparent morphology of the adventitious root had four stages, including root pre-emergence stage ( $S_0$ ), early stage of root formation ( $S_1$ ), massive root formation stage ( $S_2$ ), and later stage of root formation ( $S_3$ ). The suitable concentrations of the three exogenous hormones, IAA, NAA and GGR, were  $100 \text{ mg}\cdot\text{L}^{-1}$ ,  $300 \text{ mg}\cdot\text{L}^{-1}$ , and  $300 \text{ mg}\cdot\text{L}^{-1}$ , respectively. They shortened the rooting time by 25–47.4% and increased the rooting percentages of cuttings by 0.9–1.3 times, compared with that in the control. The dispersion in  $S_0$  stage was 3.6 times of that in the  $S_1$  stage after exogenous hormone application. The earlier the third critical point ( $P_3$ ) appeared, the shorter the rooting time and the greater the rooting percentage of the cuttings. During rhizogenesis, the activities of three antioxidant enzymes (POD, SOD, and PPO) showed an A-shaped trend. However, peak values of enzyme activity appeared at different points, which were 9 d before the  $P_3$ ,  $P_3$ , and the fourth critical point ( $P_4$ ), respectively. Exogenous hormone treatment reduced the time to reach the peak value by 18 days, although the peak values of the enzymatic activities did not significantly changed. Our results suggested that exogenous hormone treatment mainly acted during the root pre-emergence stage, accelerated the synthesis of antioxidant enzymes, reduced the rooting time, and consequently promoted root formation. The three kinds of antioxidant enzymes acted on different stages of rooting.

Company Limited provided support in the form of salaries for author WZ, but did not have any additional role in the study design, data collection and analysis, decision to publish, or preparation of the manuscript. The specific roles of this author (WZ) is articulated in the 'author contributions' section.

**Competing interests:** WZ is an employee of Yangzhou Crabapple Horticulture Company Limited. This does not alter our adherence to PLOS ONE policies on sharing data and materials.

## Introduction

*Malus hupehensis* (Pamp.) Rehd. is a major accession of *Malus* spp. and is widely distributed across China [1, 2]. *M. hupehensis* has been cultivated as an ornamental tree and utilized as medicine and food. Recently, it has also been considered as a prime rootstock species in the southern region of the China Yellow River Basin [3]. Although *M. hupehensis* is regarded as a triploid species with facultative apomixes [4, 5], it also presents a certain level of differentiation post-sowing. Therefore, it is critical that stem cutting propagation of *M. hupehensis* be developed and implemented.

Vegetative propagation using the stem cutting method can be considered as a post-operation root regeneration process. Once a stem is cut from its parent plant, its nutrient and water supply is lost. Under such conditions, the plant is exposed to oxidative stress, and its redox balance is destroyed [6]. How to increase cellular antioxidant resistance, restore redox balance, and promote adventitious root formation (ARF) are critical to stem survival [7, 8]. The ARF process generally consists of three stages: induction, initiation, and extension (including outgrowth within the stem and outgrowth from the stem) [9]. Exogenous hormone treatment is one of the major methods for improving ARF [10, 11]. The mechanism underlying the promotion of ARF by exogenous hormone treatment has been largely investigated. Several studies have shown that exogenous hormone treatment accelerates cell division, promotes synthesis of endogenous hormones (e.g., auxins, cytokines, and gibberellins) and salicylic acid, stimulates carbohydrate accumulation, and consequently induces ARF [8, 12–14]. Exogenous hormone treatment also increases peroxidase (POD) and polyphenol oxidase (PPO) activity, decreases the activity of IAAO and subsequently promotes root formation. The activity of POD and PPO continuously increases during the adventitious root induction and initiation phases, it gradually decreases during the extension phase, whereas the H<sub>2</sub>O<sub>2</sub> profiles and IAAO activity are exactly the opposite of that of POD and PPO [15–17]. Therefore, changes in POD and PPO activity are often used as biochemical indicators for various stages of ARF [18–20]. However, most current studies have focused on microscopic cellular features prior to the formation of root primordia as well as other physiological and biochemical changes, whereas the importance of specific critical points such as adventitious root cortical breakthrough and massive root formation have not been established completely.

By using exogenous hormone treatment, this paper studied the dynamics of rooting of *M. hupehensis* cutting and the changes in the activity levels of antioxidant enzymes (POD, SOD, and PPO). The purposes were as follows: (1) To establish the critical points of apparent morphology in the rooting process; (2) To explore the effect of exogenous hormones on the rooting process; (3) To explore the rhythm correlation between rooting process and three antioxidant enzymes (POD, PPO, and SOD).

## Materials and methods

### Plant materials

Cultures of *M. hupehensis* stem cuttings were established under natural light conditions. The cutting matrix consisted of a perlite-vermiculite mix (2:1 vol). The cutting matrix depth was 15 cm. In February, stem cuttings were prepared from one-year-old parent plants of *M. hupehensis*. All the cuttings were 10–12 cm in length, 0.5–0.6 cm in diameter, and with 4–6 buds.

### Methods and measurements

**Evaluation of the root regeneration process.** A two-factor randomized experiment was performed. A total of 13 treatment groups using four different concentrations (100, 300, 500,

or 700 mg·L<sup>-1</sup>) of IAA, NAA, or GGR (20% amino acids, 2% trace elements; Beijing Erbitux Biological Technology Co., Ltd., Peking, China.) and one water-treated control group were assessed in terms of morphological characteristics and rooting percentages. Each treatment consisted of 600 cuttings that were further divided into two groups, with each group comprising 300 cuttings.

Group 1 was used to observe the rooting process every 3 days after planting in which five cuttings were randomly selected for observation. The initial date of planting was designated as P<sub>0</sub>. The date of root emergence through the stem epidermis was identified as the root emergence day (P<sub>3</sub>). The date when the number of roots reached ≥ 3, root length measured ≥ 1 cm, and the lateral root started to appear was recorded as the day of massive root formation (P<sub>4</sub>). The date when the structured main lateral root system was formed and 80% of the root system changed to brownish red was denoted as the day of root system formation (P<sub>5</sub>). The root pre-emergence stage (S<sub>1</sub>) consisted the period from P<sub>0</sub> to P<sub>3</sub>, the early stage of root formation (S<sub>2</sub>) included the period from P<sub>3</sub> to P<sub>4</sub>, the root massive formation stage (S<sub>3</sub>) comprised the period from P<sub>4</sub> to P<sub>5</sub>, and later stage of root formation contained the time after P<sub>5</sub>. Because no anatomical observations were made before the root pre-emergence stage, for the consistency of the description of the rooting process, the day of root primordia initial cell formation in this stage was noted as P<sub>1</sub>', and the time for formation of the root primordium was P<sub>2</sub>' [9].

Group 2 was used for the analysis of the percentage of cuttings that underwent rooting. At 72 d post-planting, three subgroups were randomly chosen from the respective 13 treatment groups, and each subgroup consisted of 30 cuttings.

**Measurement of antioxidant enzymes activity.** Approximately 2,000 cuttings were subjected to treatment using 100 mg·L<sup>-1</sup> IAA or water to monitor the dynamic changes in the activities of POD, SOD and PPO during root regeneration. Cutting samples were collected at the day of planting, and at each 9-d interval. At each time point, three subgroups were randomly selected from each treatment group and each subgroup included 30 cuttings. The collected cuttings were rinsed with water, kept in an ice box. The phloem located 2 cm from the base of the cuttings were peeled, cut into pieces, and kept at -70°C until further testing.

To measure the activity of antioxidant enzymes, 0.2 g of each sample was weighed from the above mixture of tissues from each subgroup of every treatment with three replicates. The sample was ground in a mortar on ice with 6 mL of 0.05 mol·L<sup>-1</sup> pre-cold phosphate buffer (pH 7.8) for enzyme extraction. The homogenate was centrifuged at 9,000 rpm for 20 min at 4°C, the pellet discarded, and the supernatant was used in the enzyme assay.

POD activity was determined according to the method of Tian et al. [21] based on the oxidation of guaiacol using H<sub>2</sub>O<sub>2</sub>. Briefly, 0.2 mL of the enzyme extract was added to a reaction solution containing 3.8 mL of 0.3% guaiacol potassium sulfonate and 0.1 mL of 0.3% H<sub>2</sub>O<sub>2</sub>. One unit of POD activity was defined as the increase in absorbance recorded at one OD value of A<sub>470</sub> per min per gram fresh weight. Phosphate buffer was used as blank control.

SOD activity was determined according to the method of Giannopolitis and Ries [22], which measured its ability to inhibit the photochemical reduction of nitrobluetetrazoliumas. Briefly, 0.05 mL of the enzyme extract was added to a 2.95-mL reaction solution containing 0.3 mL of 20 μmol·L<sup>-1</sup> riboflavin, 0.3 mL of 130 mmol·L<sup>-1</sup> methionine, 0.3 mL of 750 μmol·L<sup>-1</sup> NBT, 0.3 mL of 100 μmol·L<sup>-1</sup> Na<sub>2</sub>EDTA, 1.5 mL of 0.05 mol·L<sup>-1</sup> potassium phosphate buffer (pH 7.8) and 0.25 mL of distilled water. The reaction solution was placed under a 4,000 lx fluorescent lamp for 20 min, whereas the control sample was kept in dark. The solution was then placed in the dark for 5 min to stop the reaction. One unit of SOD activity was defined as the amount of enzyme that inhibited 50% of NBT and was expressed as unit per min per gram fresh weight. Phosphate buffer was used as blank control.

PPO activity was determined according to the method of Yan et al. [23]. Briefly, 0.5 mL of the enzyme extract was added to 4.5 mL of a reaction solution containing 3.5 mL phosphate buffer (pH 6.0), and 1 mL of 0.1 mol·L<sup>-1</sup> catechol, mixed well, and incubated at 37°C for 10 min. Approximately 2 mL of 20% trichloroacetic acid was added to the mixture to stop the reaction, which was then followed by centrifugation at 6,000 rpm for 10 min. One unit of PPO activity was defined as the increase in absorbance recorded at one OD value of A420 per min per gram fresh weight. An inactivated enzyme solution was used as blank control.

## Data analysis

Statistical analysis was performed using SAS 8.1 software (SAS Institute). ANOVA was performed for each variable and the means were compared by using Duncan's multiple range test at a significance level of 0.05 or 0.01. A graph was prepared by using Origin Pro 8 software.

The effect of exogenous hormones on the rooting stage was analyzed, and expressed as the dispersion of the rooting stage length between the treatment and the control. The following formula was used:

$$\sigma' = \sqrt{\frac{\sum_{i=1}^{12} (x_i - x_0)^2}{12}}$$

where  $x_i$  represents the time to root in each treatment group,  $x_0$  represents the time to root in the control group.

## Results

### Observation of the morphological characteristics of *Malus hupehensis* during rhizogenesis of cuttings

The dynamic observation graph and explanation of rooting of cutting of *Malus hupehensis* treated with IAA 100 mg·L<sup>-1</sup> are shown in Fig 1 and Table 1. Results showed that the apparent morphology of the adventitious root had four stages (pre-emergence, early stage of root formation, massive root formation, and later stage of root formation), and each stage had distinct morphological characteristics. The characteristic of the root pre-emergence stage was the formation and enlargement of the callus (Fig 1A,1B and 1C). The characteristic of the early stage of root formation was the emergence of young adventitious roots, which were located at the bark of the cutting base (about 0–2 cm away from the incision) rather than callus (Fig 1D and 1E). This showed that the rooting type of cutting of *M. hupehensis* was the phloem-rooting type. The most important characteristic of the massive root formation stage was the increase in the number of adventitious roots and the emergence of lateral roots (Fig 1F and 1G). The most important characteristic of later stage of root formation was the formation of the structured main lateral root system (Fig 1H and 1I).

### The effects of exogenous hormone treatment during rhizogenesis of cuttings

As shown in Fig 2A, the type and concentration of hormone had a significant effect on rooting percentage of cutting and rooting time of cutting ( $P < 0.0001$ ). The suitable concentrations of three exogenous hormones (IAA, NAA, and GGR) for rooting were 100 mg·L<sup>-1</sup>, 300 mg·L<sup>-1</sup>, and 300 mg·L<sup>-1</sup>, respectively, the rooting percentages were 2.29, 1.88, and 1.94 times the control values, respectively, and the durations of the rooting formation ( $S_1$ ) were shorted by 47.4%, 25.0%, and 31.3%, respectively (Fig 2A). There was a significant negative correlation

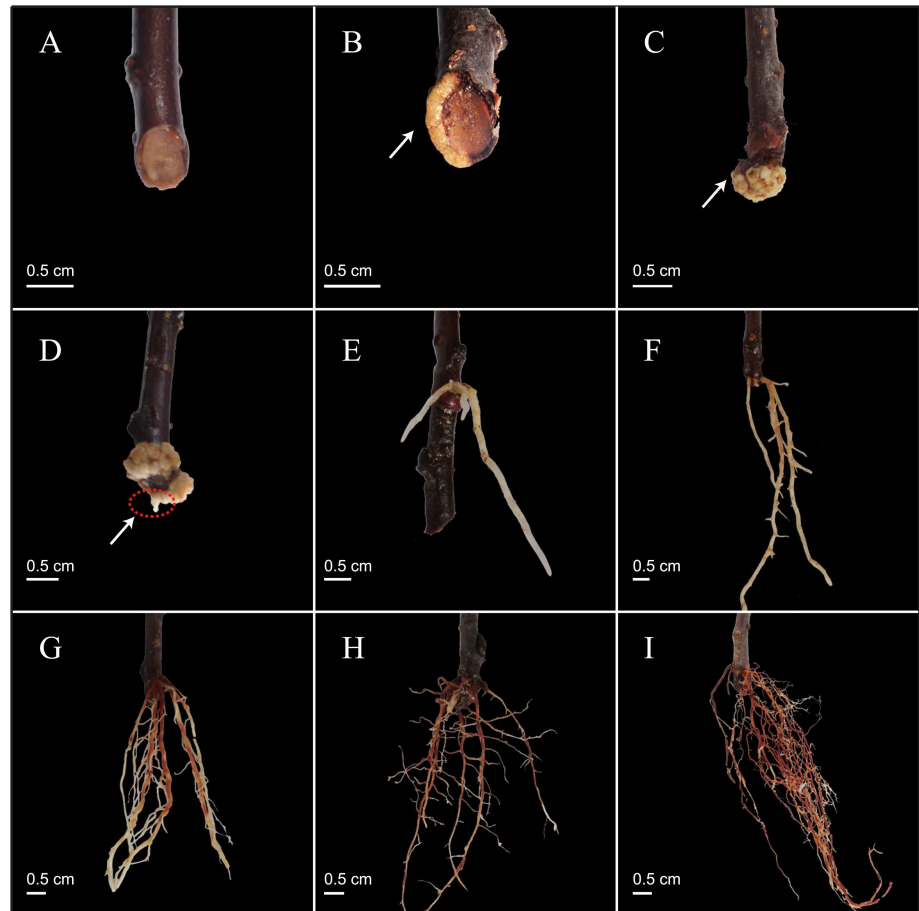

**Fig 1. Dynamic changes in apparent morphology during rhizogenesis of *Malus hupehensis* cuttings (with IAA 100 mg·L<sup>-1</sup> treatment).** A–I were after IAA hormone treatment of cuttings lasting 0 d, 9 d, 18 d, 27 d, 36 d, 45 d, 54 d, 63 d, and 72 d, respectively.

doi:10.1371/journal.pone.0172320.g001

between rooting time of cutting and cutting rooting percentage (Fig 2B). During the  $S_0$  and  $S_0+S_1$  stages, the relationship function between rooting time of cutting and cutting rooting percentage were  $f_1(x) = 143.90 - 2.14x$  ( $R^2 = 0.90$ ,  $P < 0.0001$ ) and  $f_2(x) = 202.26 - 2.15x$  ( $R^2 = 0.84$ ,  $P < 0.0001$ ), respectively, indicating that the shorter the rooting time, the greater the rooting percentage. However, results showed that the slopes of the two linear functions  $f_1(x)$  and  $f_2(x)$  were almost equal. In fact, no significant correlation was observed between the  $S_1$  stage and the cutting rooting percentage (Fig 2B). Based on the rooting data presented in Fig 2A, the dispersion of  $S_1$  ( $\sigma^2 = 11.6$  days) was determined to be obviously longer (3.6 times) relative to that of  $S_2$  ( $\sigma^2 = 3.2$  days).

### Changes in enzyme activities during rhizogenesis

During the rooting process, the enzymatic activities of POD, SOD, and PPO in the phloem tissue of the cuttings followed an A-shaped trend, wherein it initially increased, reached a peak value, and then decreased (Fig 3). However, the time to reach its peak value varied among the three enzymes (as indicated by the arrow in Fig 3). The POD activity peaked at 9 days before the emergence of the adventitious roots, the time to reach the highest SOD activity synchronized well with the emergence time of the adventitious roots, whereas PPO activity peaked at

**Table 1. Morphological characteristics of *Malus hupehensis* during rhizogenesis of cuttings.**

| Rooting stage                           | Days after planting (d) | Description of appearance.                                                                                                                                                                                                                              | Function and significance                                                                                                                                                         | Critical Points |
|-----------------------------------------|-------------------------|---------------------------------------------------------------------------------------------------------------------------------------------------------------------------------------------------------------------------------------------------------|-----------------------------------------------------------------------------------------------------------------------------------------------------------------------------------|-----------------|
| Root pre-emergence stage ( $S_0$ )      | 0                       | Incision smooth, fresh.                                                                                                                                                                                                                                 | Physiological induction and formation of root primordia.                                                                                                                          | $P_1'$ , $P_2'$ |
|                                         | 9                       | In the 1/4 to 1/2 of the edge of the incision, milk yellow callus formed with circular distribution.                                                                                                                                                    |                                                                                                                                                                                   |                 |
|                                         | 18                      | Milk yellow callus expanded to beyond 2/3 of the edge of the incision.                                                                                                                                                                                  |                                                                                                                                                                                   |                 |
| Early stage of root formation ( $S_1$ ) | 27                      | Milky white adventitious roots emerged from the epidermis.                                                                                                                                                                                              | The formation and recovery of root absorption function is an important indicator of the survival rate of cuttings.                                                                | $P_3$           |
|                                         | 36                      | More milky white adventitious roots emerged from the epidermis and the length of the root increased.                                                                                                                                                    |                                                                                                                                                                                   |                 |
| Massive root formation ( $S_2$ )        | 45                      | The differentiation of the main roots and the lateral root began to form; the number of main roots with length $\geq 1$ cm was more than 3; the base of the root gradually took on a pale reddish brown color; level one lateral roots began to appear. | The root absorption function was significantly enhanced, and the ability of root regeneration was strong at transplanting stage, with certain stress resistance and adaptability. | $P_4$           |
|                                         | 54                      | The number of adventitious roots increased further; about 50% of the roots turned into pale brown red.                                                                                                                                                  |                                                                                                                                                                                   |                 |
| Root post-emergence stage ( $S_3$ )     | 63                      | The structured dominant lateral root system has been formed, and about 80% of the roots changed to brownish red.                                                                                                                                        | Stress resistance and adaptability were strong, but the ability of root regeneration decreased when transplanted decreased.                                                       |                 |
|                                         | 72                      | A well-developed root system has developed with a dark brownish red color.                                                                                                                                                                              |                                                                                                                                                                                   |                 |

$P_1'$  represents the date of root primordia initial cell formation;  $P_2'$  represents the date for formation of the root primordium;  $P_3$  represents the date of adventitious root emergence through the stem epidermis,  $P_4$  represents the date of massive root formation.

doi:10.1371/journal.pone.0172320.t001

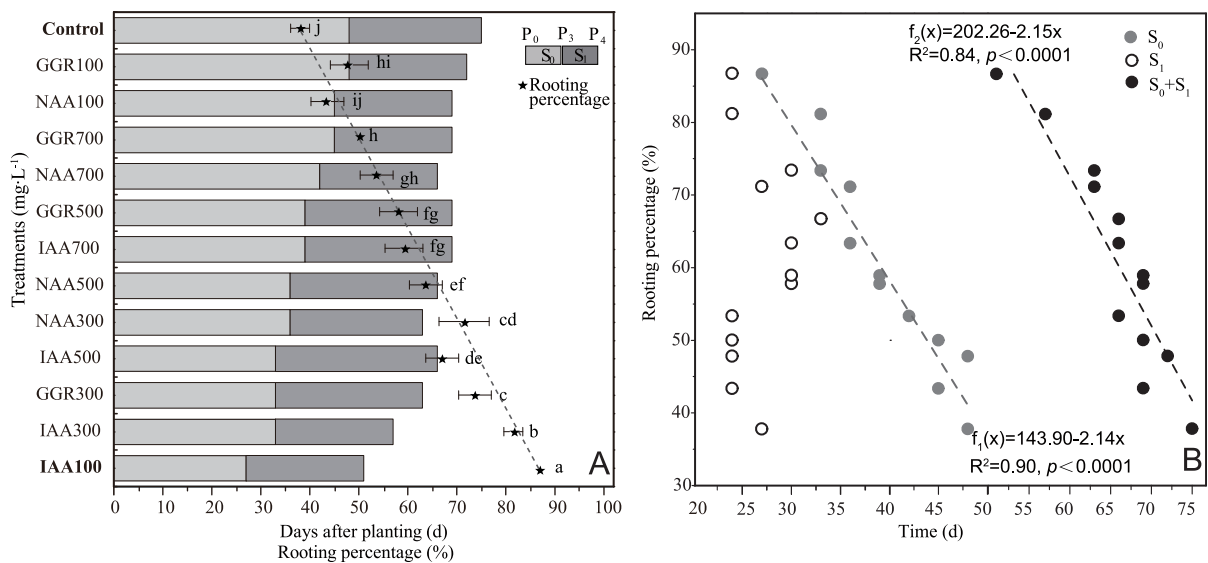

**Fig 2. Relationship between rooting stage of *Malus hupehensis* cuttings and rooting percentage.** A: Effects of different exogenous hormones on rooting percentage and rooting stage of *Malus hupehensis* cuttings, B: Correlation between different rooting stages and rooting percentage.  $P_0$  represents the date when cuttings were planted.  $S_1$  is the root pre-emergence stage, which represents the time from  $P_0$  to  $P_3$ ; and  $S_2$  is the early stage of root formation, which represents the time from  $P_3$  to  $P_4$ . Rooting percentage data was transformed using arc sine after square-root transformation after ANOVA. Different lower case letters behind each rooting data indicate significant differences at  $p \leq 0.05$  by using Duncan's test.

doi:10.1371/journal.pone.0172320.g002



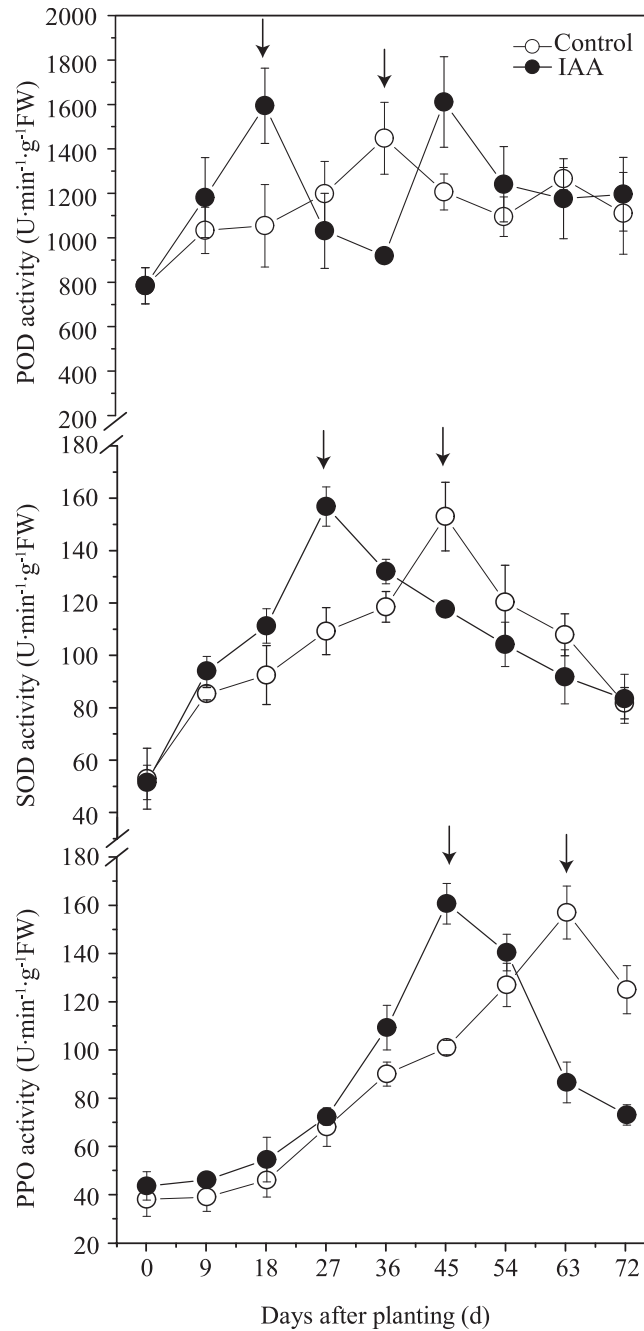

**Fig 3. Changes in POD, SOD, and PPO enzyme activities during rhizogenesis in cuttings of *M. hupehensis*.**

doi:10.1371/journal.pone.0172320.g003

18 days after the development of adventitious roots (which synchronized well with root massive emergence).

The characteristic values (peak values and simultaneous values) of POD, SOD, and PPO were extracted from Fig 3 and presented in Table 2. Table 2 shows that exogenous hormone treatment significantly increased the synthesis rate of POD ( $P = 0.02$ ), SOD ( $P = 0.0007$ ), and PPO ( $P = 0.0002$ ), and the time to reach its peak value was reduced to 18 days as compared to

**Table 2. Characteristic values (peak and simultaneous values) of POD, SOD, and PPO in the phloem tissue of exogenous hormone-treated cuttings during rhizogenesis.**

| Treatment | POD activity/ (U·min <sup>-1</sup> ·g <sup>-1</sup> FW) |                    | SOD activity / (U·min <sup>-1</sup> ·g <sup>-1</sup> FW) |                    | PPO activity(U·min <sup>-1</sup> ·g <sup>-1</sup> FW) |                    |
|-----------|---------------------------------------------------------|--------------------|----------------------------------------------------------|--------------------|-------------------------------------------------------|--------------------|
|           | Peak value                                              | Simultaneous Value | Peak Value                                               | Simultaneous Value | Peak Value                                            | Simultaneous Value |
| Control   | 1,447.50 ± 161.60                                       | 1,053.75 ± 185.65  | 153.01 ± 13.12                                           | 109.00 ± 9.00      | 156.5 ± 10.93                                         | 101.25±3.44        |
| IAA       | 1,593.75 ± 169.34                                       | 1,593.75 ± 169.34  | 165.27 ± 4.766                                           | 165.27 ± 4.766     | 177.25 ± 9.56                                         | 177.25±9.56        |
| Y (%)     | 10.10 <sup>ns</sup>                                     | 51.25*             | 8.01 <sup>ns</sup>                                       | 51.28**            | 13.26 <sup>ns</sup>                                   | 75.06**            |

Data are expressed as the mean ± SD (N = 90). Simultaneous value, representing the values measured in the control group at the same time when the peak values were reached in the IAA-treated group; Y = (IAA – Control)/Control × 100%.

ns: nonsignificant,

\* P < 0.05,

\*\*P < 0.01.

doi:10.1371/journal.pone.0172320.t002

that observed in the control group. In addition, the peak values of POD, SOD, and PPO were 51.3%, 51.3%, and 75.1%, respectively, higher than the simultaneous value of the control group. However, the peak values of POD, SOD, and PPO in the exogenous hormone groups and the control group were not significantly different ( $P > 0.05$ ).

### Synergistic relationship between morphogenesis and endogenous substances during rhizogenesis

In order to analyze the synergistic relationship between morphogenesis and the endogenous substances in the rooting process of cuttings, four critical morphological points closely related to rooting were assessed: initial formation of root primordial cells (first critical point), root primordium formation (second critical point), adventitious root breakthrough epidermis (third critical point), and adventitious root massive occurrence (fourth critical point). According to the statistical analysis of the three key enzymes in the study and the data in the literature [15, 24–27], results showed there were obvious differences between the fit proportion of the four key critical points and the anabolic rhythm of endogenous substances (peak/valley) during rhizogenesis (Fig 4A). The endogenous hormones, enzymes, and carbohydrates associated with rooting were mainly fit at the second and third critical points (fit proportion of 30% and 50%, respectively) (Fig 4B). Before the third critical point, the fit proportion continued to rise but declined sharply once reaching the fourth critical point (Fig 4B).

### Discussion

#### Establishment of key critical points of apparent morphology in the rooting process of cuttings

Adventitious root formation (ARF) is a complicated process involving morphological, physiological, and biological changes [19, 28]. Based on observed anatomical changes [9], the ARF process was divided into three stages: induction (primordial initial cell establishment and pith development with cell de-differentiation followed by cell division), initiation (primordia and meristems initiate), and extension (including outgrowth in stems and outgrowth from stems) (Fig 4A). In the present study, based on the dynamic observation of the process of root formation, ARF was divided into root pre-emergence stage ( $S_0$ ), early stage of root formation ( $S_1$ ), massive root formation stage ( $S_2$ ), and later stage of root formation ( $S_4$ ) (Fig 4A). The major differences between these two staging system are that the  $S_0$  stage included the stage of induction, initiation, and outgrowth in stem of the former staging system, whereas the outgrowth



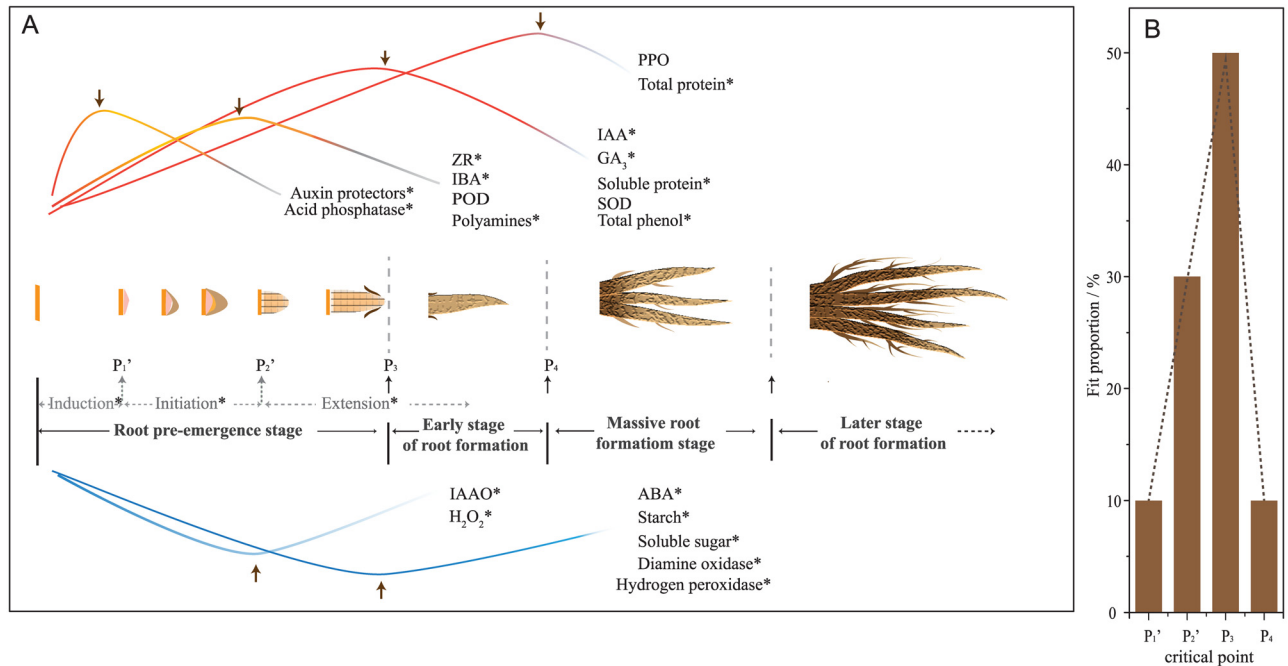

**Fig 4. Fitting relationship between the dynamic change in endogenous substances and the apparent critical points during rhizogenesis.** A: Schematic change in the levels of endogenous substances of cuttings during the formation of adventitious roots. B: The fit proportion between endogenous substances and the apparent critical points. P<sub>1</sub>' represents the establishment of primordial cells in the adjacent cambium; P<sub>2</sub>' represents adventitious root primordia and meristem initiation; P<sub>3</sub> represents adventitious roots emergence through the epidermis of the stem; P<sub>4</sub> represents the number of root  $\geq 3$ , average root length  $\geq 1$  cm and the lateral root started to appear. \*Adapted from references [15, 24–27]. Abbreviation: GA<sub>3</sub>, gibberellic acid; IBA, indole butyric acid; ZR, zeatin riboside.

doi:10.1371/journal.pone.0172320.g004

from stem stage of the former staging system was further divided into S<sub>2</sub>, S<sub>3</sub> and S<sub>4</sub> in our new staging system. To elucidate the mechanisms and process of ARF, the former staging system is more focused on the microscopic observation at the cellular and tissue level using initial formation of root primordial cells and the formation of root primordia as the first and second critical points, respectively. On the other hand, our proposed staging system mainly concentrates on morphological observations of plant organs levels using adventitious root cortical breakthrough and massive root formation as the third and fourth critical points, respectively (Fig 4A). Most current studies pay more attention to the first and second critical points in the early stage of ARF while neglecting the third and fourth critical points in the late stage of ARF. However, the third and fourth critical points are highly significant to the survival rate of cuttings and transplants. The third critical point (adventitious root cortical breakthrough) indicates the initiation of root absorption function recovery, which is an important parameter for the evaluation of the survival rate of cutting, whereas the fourth critical point (massive root formation) represents the recovery of root absorption function and an increase in adaptiveness, which are important parameters affecting transplant survival rate.

In this study, at suitable concentrations, all the three exogenous hormones significantly promoted rooting of the cuttings (the rooting percentage was 1.88–2.29 times higher than that of the control, and the rooting time of S<sub>0</sub> was shortened by 25.0–47.4%) (Fig 2A). Due to the discovery of the significant negative correlation between the timing of the third critical point (P<sub>3</sub>) appearance and cutting rooting percentage, the earlier the P<sub>3</sub> appeared, the greater the rooting

percentage. Of course, there was a different correlation between different rooting stages and cutting rooting percentage. There was a significant correlation between  $S_0$  stage and cutting rooting percentage ( $R^2 = 0.90$ ,  $P < 0.0001$ ), but there was no correlation in the  $S_1$  stage (Fig 2A and 2B). In addition, we found that the dispersion of  $S_0$  stage was significantly longer than that of  $S_1$  stage, indicating the rooting effects of exogenous hormone treatment during  $S_0$  stage (the period before  $P_3$ ) was greater than during  $S_1$  stage (the period from  $P_3$  to  $P_4$ ). This might be related to the higher (50%) fit proportion at  $P_3$  (five times to that at the  $P_4$ ) (Fig 4B). In this way, the third critical point (adventitious root penetrating epidermis,  $P_3$ ) was crucial for rooting of cutting.

Many researchers believe that the root primordium induction stage is the key stage of cutting rooting [9, 29]. However, this assumption lacks statistical supporting data. Although this study did not include anatomical observation, the statistical results supported this view because the fit proportion of the second critical point (root primordia formation,  $P_2$ ) was as high as 30% (Fig 4B).

### The effects of three types of antioxidant enzymes (POD, PPO, and SOD) on different stage during root formation in *M. hupehensis* cuttings

Once the stems are cut from the parent plant, its nutrient and water supplies are cut off. The stems are thus under stress prior to the formation of adventitious roots. How to improve its resistance to stress and to reduce the time needed for root formation are critical for the survival of the cuttings. Antioxidant enzymes such as POD, PPO and SOD not only play important roles in a plant's antioxidant defense [30, 31], but also affect the formation and development of adventitious roots [19, 29, 32]. In the present study, we found that the synthesis of these three enzymes varied among stages of the ARF process. The peak activity of POD was observed at 9 days before the third critical point, and the peak activity of SOD synchronized with the third critical point, whereas the peak activity of PPO synchronized with the fourth critical point (Figs 3 and 4). The observed differences might be explained by the fact that these three types of antioxidant enzymes promote ARF using distinct mechanisms.

The cell wall is an important defense barrier against pathogen invasion and expansion [33]. Increased lignin synthesis and extensin accumulation facilitate cell wall formation and improve its strength [34]. Increased POD activity promotes the biosynthesis of lignin and phellem layer; it also promotes the production of iso-2-tyrosin in hydroxyproline-rich glycoproteins (HRGP; extensin) [15, 33, 35]. Therefore, a moderate reduction in POD-type enzymes activity could decrease cell wall strength and consequently promote cell division, expansion, and plant growth, whereas an increase in POD-type enzyme activity increases the resistance of cells to stress [17, 34, 36]. The present study determined that the POD activity steadily and gradually increased during the early stages of root formation in cuttings and peaked at 9 days before the third critical point. The increase in POD activity at the early stage facilitates in scavenging for  $H_2O_2$  molecules, increases cell wall strength, and subsequently increases resistance to stress. At a later stage, POD activity decreases, which in turn facilitates cell expansion and growth.

PPO promotes cell division, differentiation, as well as root primordia formation and development [37]. PPO also accelerates the formation of IAA-phenolic compounds and consequently promotes ARF [15, 17, 38]. The present study showed that PPO activity continuously increases before the emergence of the fourth critical point and peaks synchronously with the fourth critical point. This result indicates that continuous increases in PPO activity promote ARF throughout the entire process of induction to development.

As an important antioxidant defense line, SOD catalyzes the dismutation of excess  $O_2^{\cdot-}$  into  $O_2$  and  $H_2O_2$ , which can be further catalyzed by POD and other enzymes to form  $H_2O$  and  $O_2$ , and therefore prevent the cells from compositional, structural, as well as functional damages caused by free oxygen radicals [39, 40]. Increased SOD activity can improve the defense of cuttings against stress by scavenging reactive oxygen [41]; however, the effects of SOD on root formation of cuttings have not been reported. The present study showed that SOD activity continuously increases before the third critical point and peaks synchronously with the third critical point. This finding suggests that a continuous increase in SOD activity mainly occurs prior to the formation of adventitious roots. Before root formation, cuttings are exposed to stress, and SOD activity continuously increases, which in turn enhances the resistance of cuttings against stress. After adventitious root emergence, the absorption function of the roots is recovered, thereby relieving the plant from stress, whereas SOD activity starts to decrease.

Exogenous hormone treatment significantly accelerated the synthesis of antioxidant enzymes (e.g. POD, PPO, and SOD), with the time to peak reduced to 18 days (Fig 3), thereby decreasing the time to root formation. However, exogenous hormone treatment did not change the peak activity of the enzymes (Table 2), thereby suggesting that ARF requires a certain amount of endogenous enzyme activity. However, this hypothesis requires further investigation.

## Conclusion

(1) In the rooting process of *Malus hupehensis* cutting, the apparent morphogenesis included four stages: root pre-emergence ( $S_0$ ), early stage of root formation ( $S_1$ ), massive root formation ( $S_2$ ), and later stage of root formation ( $S_3$ ). (2) At suitable concentrations, all the three exogenous hormones promoted rooting of the cuttings (the rooting percentage was 1.88–2.29 times higher than that of the control, and the rooting time of  $S_0$  was shortened by 25.0–47.4%). (3) Exogenous hormones mainly acted in  $S_0$  stage (the period before adventitious root penetrating epidermis,  $P_3$ ). The earlier  $P_3$  appeared, the shorter the rooting stage and the higher the percentage of the cuttings that undergo rooting. Third critical point was critical in rooting of cutting. (4) Exogenous hormone treatment significantly accelerated the synthesis of antioxidant enzymes (POD, SOD, and PPO). However, the three types of antioxidant enzymes acted on different rooting stages. The peak activity of POD was observed before the third critical point, and the peak activity of SOD synchronized with the third critical point, whereas the peak activity of PPO synchronized with the fourth critical point.

## Supporting information

**S1 Table. Effects of different exogenous hormones on rooting time and rooting percentage of *Malus hupehensis* cuttings.**  $P_0$ , the starting date;  $P_3$ , the root emergence date;  $P_4$ , the massive root formation date;  $S_0$ , the root pre-emergence stage ( $P_0$ - $P_3$ );  $S_1$ , early stage of root formation ( $P_3$ - $P_4$ ).

(DOCX)

**S2 Table. Changes in POD, SOD, and PPO enzyme activities during rhizogenesis of *Malus hupehensis* cuttings.**

(DOCX)

## Author Contributions

**Conceptualization:** WZ.

**Formal analysis:** JF.

**Investigation:** QT.

**Methodology:** WZ.

**Supervision:** FC.

**Writing – original draft:** WZ JF.

**Writing – review & editing:** MZ TZ.

## References

1. Yv DJ, Lu LT, Gu CZ, Guan KJ, Jiang WF. Flora Reipublicae Popularis Sinicae, vol. 36, Rosaceae (1): Spiraeoideae-Maloideae. Beijing: Science Press; 1974.
2. Zhou ZQ. The apple genetic resources in China: The wild species and their distributions, informative characteristics and utilisation. Genetic Resources & Crop Evolution. 1999; 46: 599–609.
3. Wei YW. Research progress of *Malus hupehensis* (Pamp.) Rehd. plant resources. Horticulture & Seed. 2012; 37–40.
4. Schmidt H. Contributions on the breeding of apomictic apple stocks. 4. on the inheritance of apomixis. Z Pflanzenzucht. 1977; 78: 3–12.
5. Man WU, Wang B, Dong Y, Shen X, Mao ZQ. Research progress of apomixis in *Malus* plant. Shandong Agricultural Sciences. 2010; 24–28.
6. Papadakis AK, Roubelakis-Angelakis KA. Oxidative stress could be responsible for the recalcitrance of plant protoplasts. Plant Physiol Bioch. 2002; 40: 549–559.
7. De Klerk GJ, Der Krieken WV, De Jong JC. Review the formation of adventitious roots: New concepts, new possibilities. In Vitro Cell Dev-Pl. 1999; 35: 189–199.
8. Negishi N, Nakahama K, Urata N, Kojima M, Sakakibara H, Kawaoka A. Hormone level analysis on adventitious root formation in *Eucalyptus globulus*. New Forest. 2014; 45: 577–587.
9. Guan L, Murphy AS, Peer WA, Gan L, Li Y. Physiological and molecular regulation of adventitious root formation. Crit Rev Plant Sci. 2015; 34: 506–521.
10. Graves WR. IBA, juvenility, and position on ortets influence propagation of Carolina buckthorn from soft-wood cuttings. Journal of Environmental Horticulture. 2002; 20: 57–61.
11. Keeley K, Preece JE, Taylor BH, Dami IE. Effects of high auxin concentrations, cold storage, and cane position on improved rooting of *Vitis aestivalis* Michx. norton cuttings. American Journal of Enology & Viticulture. 2004; 55: 265–268.
12. Steffens B, Wang J, Sauter M. Interactions between ethylene, gibberellin and abscisic acid regulate emergence and growth rate of adventitious roots in deepwater rice. Planta. 2006; 223: 604–612. doi: [10.1007/s00425-005-0111-1](https://doi.org/10.1007/s00425-005-0111-1) PMID: [16160845](https://pubmed.ncbi.nlm.nih.gov/16160845/)
13. Agulló-Antón MÁ, Ferrández-Ayela A, Fernández-García N, Nicolás C, Albacete A, Pérez-Alfocea F. Early steps of adventitious rooting: morphology, hormonal profiling and carbohydrate turnover in carnation stem cuttings. Physiol Plantarum. 2014; 150: 446–462.
14. Agulló-Antón MÁ, Sánchez-Bravo J, Acosta M, Druege U. Auxins or Sugars: What makes the difference in the adventitious rooting of stored carnation cuttings? J Plant Growth Regul. 2010; 30: 100–113.
15. Rout GR. Effect of auxins on adventitious root development from single node cuttings of *Camellia sinensis* (L.) Kuntze and associated biochemical changes. Plant Growth Regul. 2006; 48: 111–117.
16. Metaxas DJ, Syros TD, Yupsanis T, Economou AS. Peroxidases during adventitious rooting in cuttings of *Arbutus unedo* and *Taxus baccata* as affected by plant genotype and growth regulator treatment. Plant Growth Regul. 2004; 44: 257–266.
17. Nag S, Saha K, Choudhuri MA. Role of auxin and polyamines in adventitious root formation in relation to changes in compounds involved in rooting. J Plant Growth Regul. 2001; 20: 182–194.
18. Moncousin CH, Gaspar TH. Peroxidase as a marker for rooting improvement of *Cynara scolymus* L. cultured in vitro 1. Biochemie Und Physiologie Der Pflanzen. 1983; 178: 263–271.
19. Gaia G, Laurent G, Catherine B. Adventitious root formation: New insights and perspectives. Annual plant reviews 2009; 37:127–156.
20. Kose C, Erdal S, Kaya O, Atici O. Comparative evaluation of oxidative enzyme activities during adventitious rooting in the cuttings of grapevine rootstocks. J Sci Food Agr. 2011; 91: 738–741.

21. Tian M, Gu Q, Zhu M. The involvement of hydrogen peroxide and antioxidant enzymes in the process of shoot organogenesis of strawberry callus. *Plant Sci.* 2003; 165: 701–707.
22. Giannopolitis CN, Ries SK. Superoxide dismutases: I. Occurrence in higher plants. *Plant Physiol.* 1977; 59: 309–314. PMID: [16659839](#)
23. Yan YH, Li JL, Zhang XQ. Effect of naphthalene acetic acid on adventitious root development and associated physiological changes in stem cutting of *Hemarthria compressa*. *Plos One.* 2014; 9: e90700. doi: [10.1371/journal.pone.0090700](#) PMID: [24595064](#)
24. Rout GR, Samantaray S, Rout MC, Das P. Metabolic changes during rooting in stem cuttings of *Casuarina equisetifolia* L.: Effects of auxin, the sex and the type of cutting on rooting. *Plant Growth Regul.* 1996; 19: 35–43.
25. Tartoura KAH. Effect of abscisic acid on endogenous IAA, auxin protector levels and peroxidase activity during adventitious root initiation in *Vigna radiata* cuttings. *Acta Physiol Plant.* 2001; 23: 149–156.
26. Tonon G, Kevers C, Gaspar T. Changes in polyamines, auxins and peroxidase activity during in vitro rooting of *Fraxinus angustifolia* shoots: An auxin-independent rooting model. *Tree Physiol.* 2001; 21: 655–663. PMID: [11446994](#)
27. Zhang WX, Fan JJ, Tan QQ, Zhao MM, Cao FL. Mechanisms underlying the regulation of root formation in *Malus hupehensis* stem cuttings by using exogenous hormones. *J Plant Growth Regul.*
28. Kevers C, Hausman JF, Faivre-Rampant O, Evers D, Gaspar T. Hormonal control of adventitious rooting: progress and questions. *J Appl Bot* 1997; 71: 71–79.
29. Najia S, Elloumi N, Jbir N, Ammar S, Kevers C. Anatomical and biochemical changes during adventitious rooting of apple rootstocks MM 106 cultured in vitro. *Cr Biol.* 2008; 331: 518–525.
30. Almeselmani M, Deshmukh PS, Sairam RK, Kushwaha SR, Singh TP. Protective role of antioxidant enzymes under high temperature stress. *Plant Sci.* 2006; 171: 382–388. doi: [10.1016/j.plantsci.2006.04.009](#) PMID: [22980208](#)
31. Mayer AM. Polyphenol oxidases in plants and fungi: Going places? A review. *Phytochemistry.* 2006; 67: 2318–2331. doi: [10.1016/j.phytochem.2006.08.006](#) PMID: [16973188](#)
32. Sato Y, Sugiyama M, Górecki RJ, Fukuda H, Komamine A. Interrelationship between lignin deposition and the activities of peroxidase isoenzymes in differentiating tracheary elements of *Zinnia*. *Planta.* 1993; 189: 584–589.
33. Lewis NG, Yamamoto E. Lignin: occurrence, biogenesis and biodegradation. *Annual Review of Plant Physiology & Plant Molecular Biology.* 1990; 41: 455–496.
34. Jackson PAP, Galinha CIR, Pereira CS, Fortunato A, Soares NC, Amancio SBQ, et al. Rapid deposition of extensin during the elicitation of grapevine callus cultures is specifically catalyzed by a 40-Kilodalton peroxidase. *Plant Physiol.* 2001; 127: 1065–1076. PMID: [11706187](#)
35. Passardi F, Cosio C, Penel C, Dunand C. Peroxidases have more functions than a Swiss army knife. *Plant Cell Rep.* 2005; 24: 255–265. doi: [10.1007/s00299-005-0972-6](#) PMID: [15856234](#)
36. Syros T, Yupsanis T, Zafiriadis H, Economou A. Activity and isoforms of peroxidases, lignin and anatomy, during adventitious rooting in cuttings of *Ebenus cretica* L. *J Plant Physiol.* 2004; 161: 69–77. doi: [10.1078/0176-1617-00938](#) PMID: [15002666](#)
37. Yilmaz H, Taşkın T, Otludil B. Polyphenol oxidase activity during rooting in cuttings of grape (*Vitis vinifera* L.) varieties. *Turkish Journal of Botany.* 2003; 27: 495.
38. Balakrishnamurthy G, Rao VNM. Changes in phenols during rhizogenesis in rose (*Rosa Bourboniana* Desp). *Curr Sci India.* 1988; 57: 960–962.
39. Ueda Y, Uehara N, Sasaki H, Kobayashi K, Yamakawa T. Impacts of acute ozone stress on superoxide dismutase (SOD) expression and reactive oxygen species (ROS) formation in rice leaves. *Plant Physiol Bioch.* 2013; 70C: 396–402.
40. Bowler C, Montagu M V, Inze D. Superoxide-dismutase and stress tolerance. *Annu Rev Plant Biol.* 1992; 43: 83–116.
41. Zhao YL, Chen X, Li CJ. Dynamic of physiology and biochemistry during wild *Rhododendron scabrifolium* cutting propagation. *Scientia Silvae Sinicae.* 2013; 49: 45–51.
